# Supplementary material for: Analysing the role of anions in the synthesis of catalytically active urea-based MOFs
Source: Royal Society of Chemistry journal article supplement (doi:10.1039/d2dt02421g), 2022-01-01
Supplement: d2dt02421g1.pdf [file d2dt02421g1.pdf]

# Analysing the Role of Anions in the Synthesis of Catalytic Active Urea-based MOF

Dipankar Ghosh and Krishna K. Damodaran\*

## Table of content

|    |                                                                       |    |
|----|-----------------------------------------------------------------------|----|
| 1. | Synthesis of the <b>H<sub>2</sub>L</b> Ligand and <b>HI-101</b> ..... | 2  |
| 2. | Crystallization details .....                                         | 2  |
| 3. | X-ray crystallography .....                                           | 4  |
| 4. | Powder X-ray diffraction .....                                        | 6  |
| 5. | Anion-templated Synthesis .....                                       | 9  |
| 6. | Thermogravimetric Analysis .....                                      | 9  |
| 7. | Catalytic activity of <b>HI-101</b> .....                             | 11 |

## 1. Synthesis of the H<sub>2</sub>L Ligand and **HI-101**

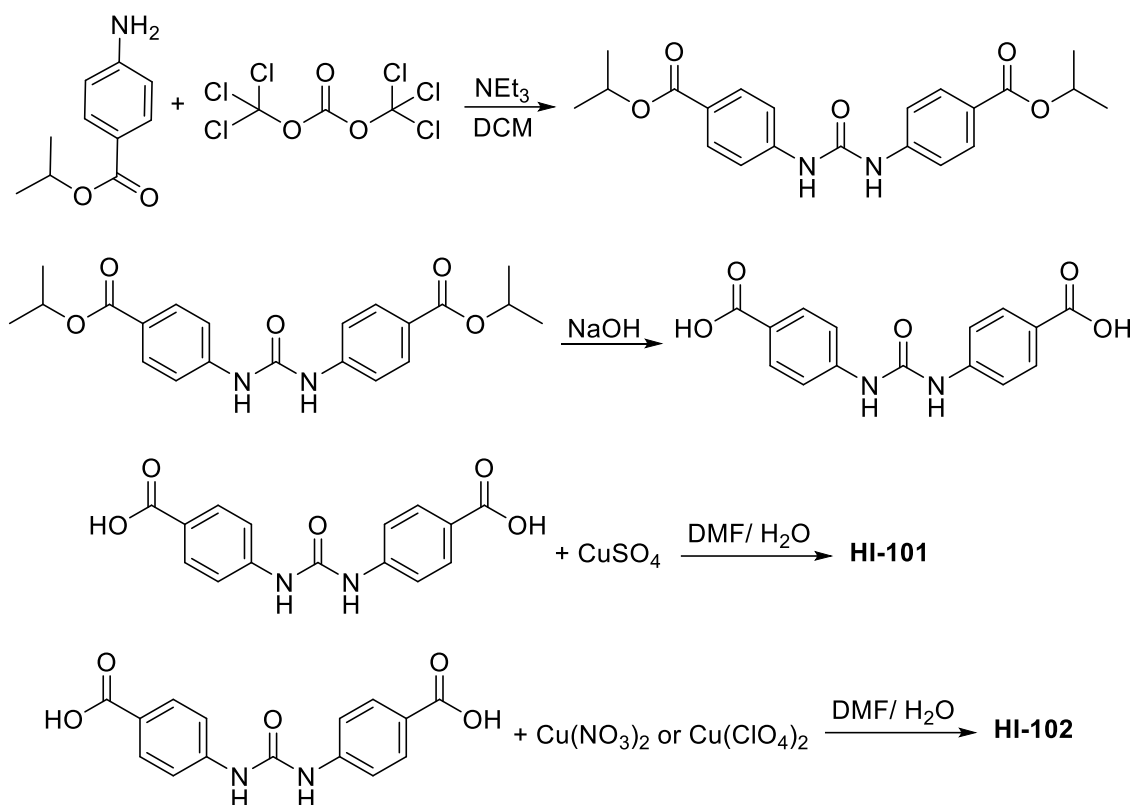

**Scheme S1:** Synthetic route of the urea functionalized ligand and MOFs.

## 2. Crystallization details

Table S1: Reaction of H<sub>2</sub>L (0.1 mmol) and copper(II) salts (0.1 mmol) in various solvents.

| Ligand Solvent | Copper(II) salts solvent | Observation                                                           |
|----------------|--------------------------|-----------------------------------------------------------------------|
| DMF (5.0 mL)   | Water (3.0 mL)           | Needle shaped crystal with CuSO <sub>4</sub> ·5H <sub>2</sub> O       |
| DMA (5.0 mL)   | Water (3.0 mL)           | Needle shaped microcrystals with CuSO <sub>4</sub> ·5H <sub>2</sub> O |
| DMSO (5.0 mL)  | Water (3.0 mL)           | Blue precipitate                                                      |
| DEF (5.0 mL)   | Water (3.0 mL)           | Needle shaped microcrystals with CuSO <sub>4</sub> ·5H <sub>2</sub> O |
| DEA (5.0 mL)   | Water (3.0 mL)           | Needle shaped microcrystals with CuSO <sub>4</sub> ·5H <sub>2</sub> O |
| DMF (5.0 mL)   | DMF (3.0 mL)             | Blue precipitate                                                      |
| DMF (5.0 mL)   | MeOH (10.0 mL)           | Blue precipitate                                                      |
| DMF (5.0 mL)   | EtOH (10.0 mL)           | Blue precipitate                                                      |

Table S2: Reaction of H<sub>2</sub>L (30.0 mg) with various copper(II) salts in DMF (5.0 mL)/water (3.0 mL)

| Copper salt                                           | Amount (mg) | Observation                |
|-------------------------------------------------------|-------------|----------------------------|
| CuSO <sub>4</sub> ·5H <sub>2</sub> O                  | 25.0        | Needle shaped crystal      |
| Cu(ClO <sub>4</sub> ) <sub>2</sub> ·6H <sub>2</sub> O | 37.0        | Plate shaped microcrystals |
| Cu(NO <sub>3</sub> ) <sub>2</sub> ·3H <sub>2</sub> O  | 24.1        | Plate shaped microcrystals |
| Cu(OAc) <sub>2</sub> ·H <sub>2</sub> O                | 20.0        | Blue precipitate           |
| CuCl <sub>2</sub>                                     | 13.3        | Yellow precipitate         |

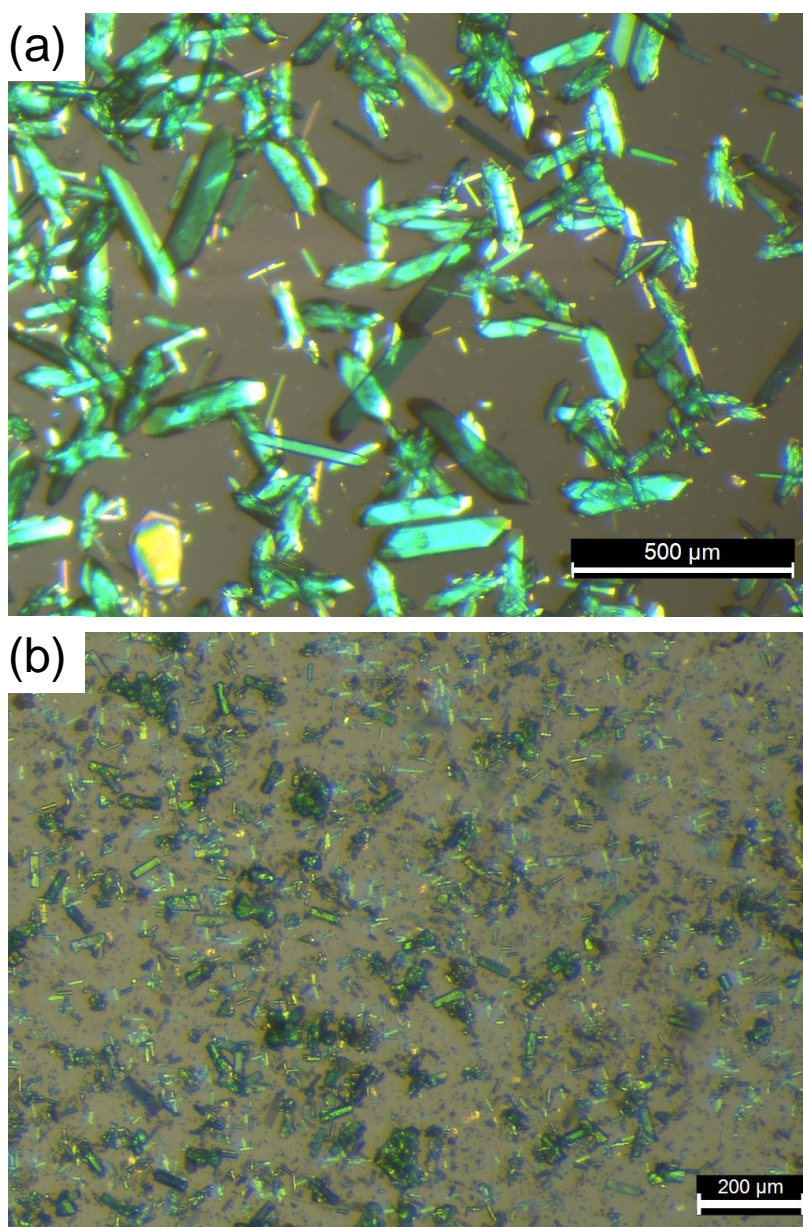

**Figure S1:** Crystals obtained from the metalation of H<sub>2</sub>L ligand: (a) with CuSO<sub>4</sub> and (b) with Cu(NO<sub>3</sub>)<sub>2</sub> or Cu(ClO<sub>4</sub>)<sub>2</sub>.

### 3. X-ray crystallography

Table S3: Crystal data of the MOFs

| Crystal data                                        | <b>HI-101</b>                                                                   | <b>HI-102</b>                                                                   |
|-----------------------------------------------------|---------------------------------------------------------------------------------|---------------------------------------------------------------------------------|
| Empirical formula                                   | [C <sub>24</sub> H <sub>31</sub> CuN <sub>5</sub> O <sub>8</sub> ] <sub>n</sub> | [C <sub>21</sub> H <sub>24</sub> CuN <sub>4</sub> O <sub>7</sub> ] <sub>n</sub> |
| Colour                                              | Green                                                                           | Green                                                                           |
| Formula weight                                      | 581.08                                                                          | 507.98                                                                          |
| Crystal size (mm)                                   | 0.13 x 0.07 x 0.04                                                              | 0.18 x 0.06 x 0.03                                                              |
| Crystal system                                      | Tetragonal                                                                      | Orthorhombic                                                                    |
| Space group                                         | <i>P4/mcc</i>                                                                   | <i>Pbca</i>                                                                     |
| a (Å)                                               | 15.2686(3)                                                                      | 18.2919(5)                                                                      |
| b (Å)                                               | 15.2686(3)                                                                      | 9.4420(3)                                                                       |
| c (Å)                                               | 29.2342(6)                                                                      | 25.3572(7)                                                                      |
| α (°)                                               | 90                                                                              | 90                                                                              |
| β (°)                                               | 90                                                                              | 90                                                                              |
| γ (°)                                               | 90                                                                              | 90                                                                              |
| Volume (Å <sup>3</sup> )                            | 6815.4(3)                                                                       | 4379.5(2)                                                                       |
| Z                                                   | 8                                                                               | 8                                                                               |
| D <sub>calc.</sub> (g/cm <sup>3</sup> )             | 1.133                                                                           | 1.541                                                                           |
| F(000)                                              | 2448                                                                            | 2104                                                                            |
| μ CuKα (mm <sup>-1</sup> )                          | 1.285                                                                           | 1.862                                                                           |
| Temperature (K)                                     | 250(2)                                                                          | 240(2)                                                                          |
| Reflections collected/<br>unique/observed [I>2σ(I)] | 37664/3094/2175                                                                 | 31808/4141/3450                                                                 |
| Data/restraints/parameters                          | 3094/0/107                                                                      | 4141/0/302                                                                      |
| Goodness of fit on F <sup>2</sup>                   | 1.099                                                                           | 1.172                                                                           |
| Final R indices [I>2σ(I)]                           | R <sub>1</sub> = 0.0767<br>wR <sub>2</sub> = 0.2625                             | R <sub>1</sub> = 0.0632<br>wR <sub>2</sub> = 0.1641                             |
| R indices (all data)                                | R <sub>1</sub> = 0.1000<br>wR <sub>2</sub> = 0.2821                             | R <sub>1</sub> = 0.0759<br>wR <sub>2</sub> = 0.1713                             |

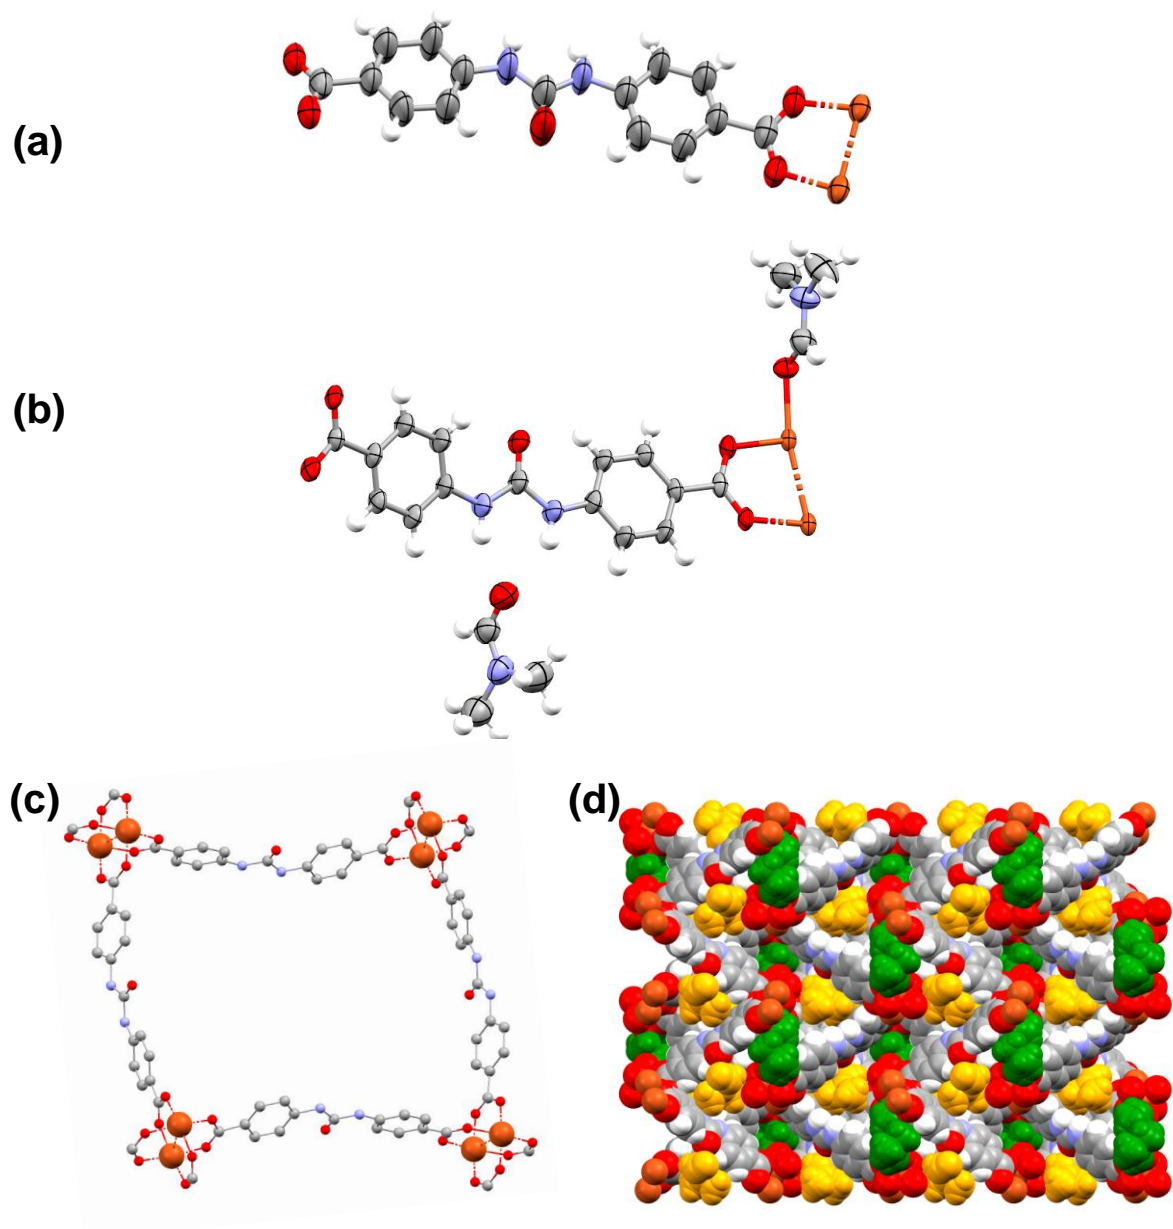

**Figure S2:** Thermal ellipsoidal plot (50% probability) of (a) **HI-101** and (b) **HI-102** (Color code: carbon-grey, nitrogen-blue, oxygen-red, hydrogen-white and copper-dark orange), (c) square grid network of **HI-102** and (d) space fill model of **HI-102** displaying the coordinated (green colour) and the solvent DMF molecules (orange) occupying the smaller and bigger pores, respectively.

#### 4. Powder X-ray powder diffraction (PXRD)

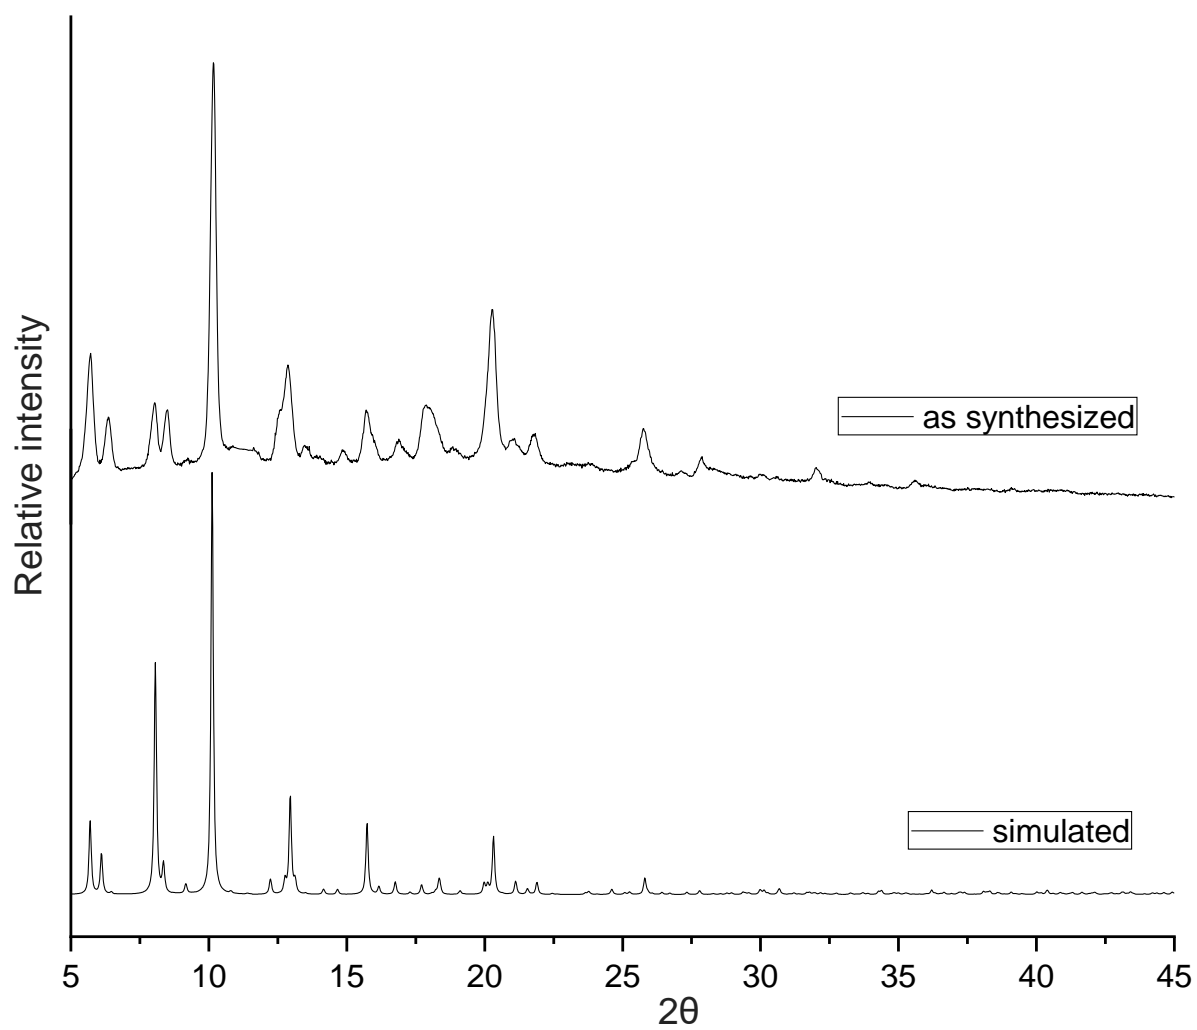

**Figure S3:** PXRD of simulated and as synthesized **HI-101**.

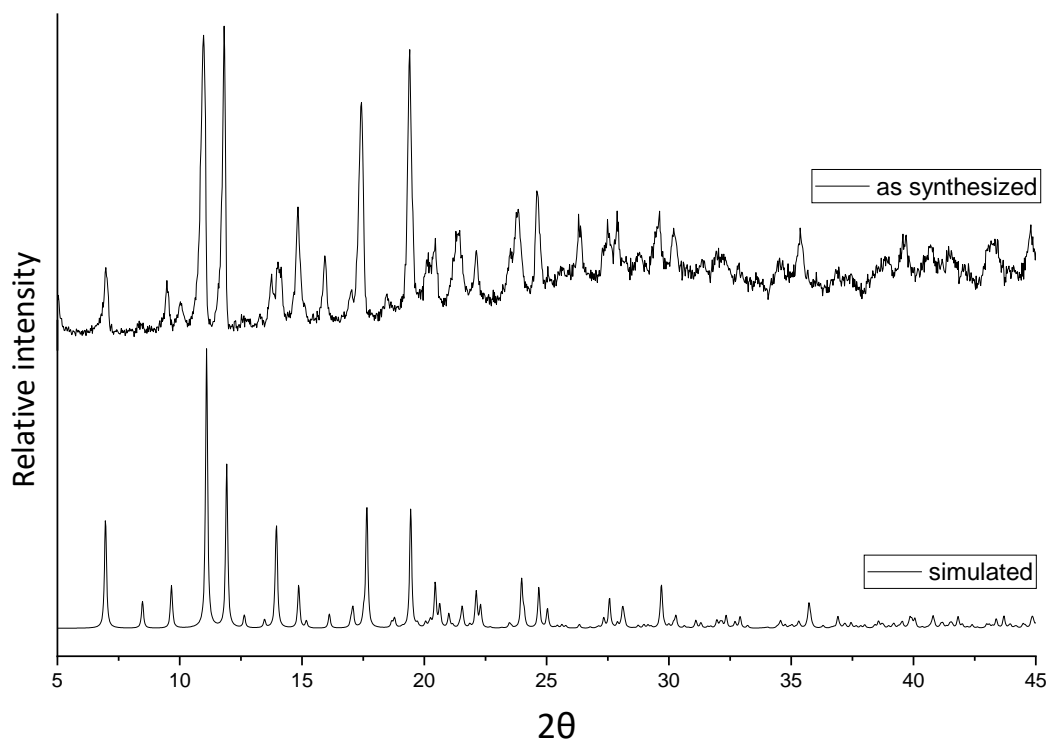

**Figure S4:** PXRd of simulated and as synthesized **HI-102**.

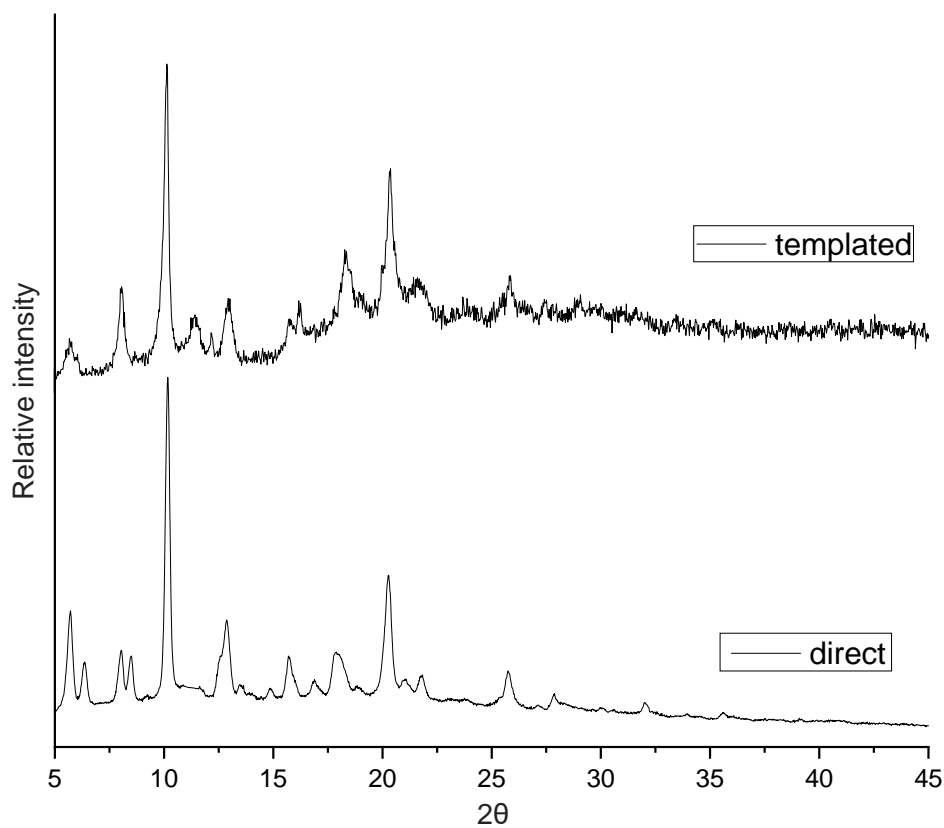

**Figure S5:** PXRd of **HI-101**: Direct synthesized from  $\text{CuSO}_4 \cdot 5\text{H}_2\text{O}$  and **H<sub>2</sub>L**; and anion-templated synthesis from  $\text{Cu}(\text{NO}_3)_2 \cdot 3\text{H}_2\text{O}$ ,  $\text{Na}_2\text{SO}_4$  and **H<sub>2</sub>L** (Entry 3, Table S4).

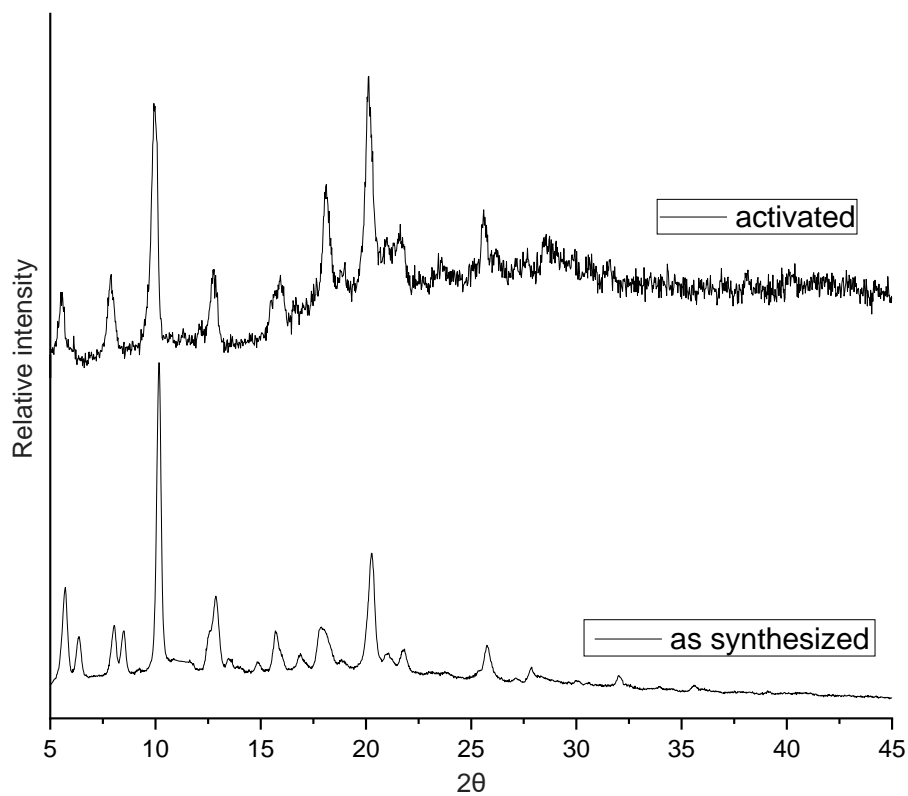

**Figure S6:** PXRD of the fresh crystals of **HI-101** and crystals after drying at 70.0 °C under vacuum for 12 hours.

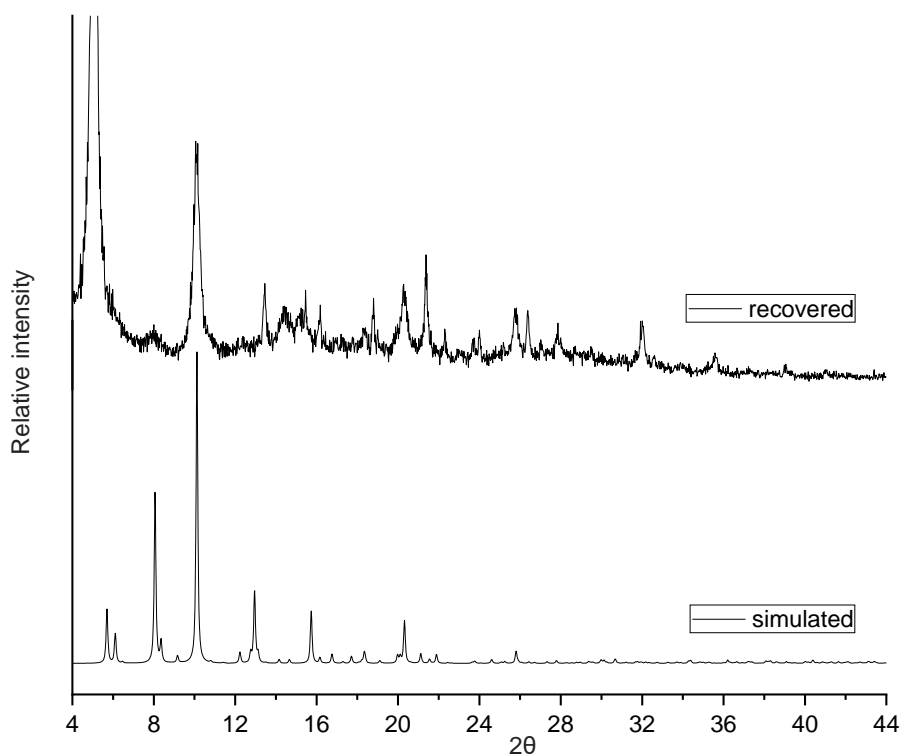

**Figure S7:** Comparison of PXRD pattern of simulated **HI-101** and the recovered **HI-101** after the CO<sub>2</sub> fixation reaction.



## 5. Anion-templated Synthesis

**Table S4:** Reaction of H<sub>2</sub>L (0.1 mmol in DMF) with various salts (0.1 mmol in water)

| Entry | Copper(II) salt                                       | Additive salt (amount)                                     | Observation                                   |
|-------|-------------------------------------------------------|------------------------------------------------------------|-----------------------------------------------|
| 1     | CuSO <sub>4</sub> ·5H <sub>2</sub> O                  | -                                                          | Needle-shaped crystal (Similar to Figure S1a) |
| 2     | Cu(NO <sub>3</sub> ) <sub>2</sub> ·3H <sub>2</sub> O  | (NH <sub>4</sub> ) <sub>2</sub> SO <sub>4</sub> (0.1 mmol) | Needle-shaped crystal (Similar to Figure S1a) |
| 3     | Cu(NO <sub>3</sub> ) <sub>2</sub> ·3H <sub>2</sub> O  | Na <sub>2</sub> SO <sub>4</sub> (0.1 mmol)                 | Needle-shaped crystal (Similar to Figure S1a) |
| 4     | Cu(NO <sub>3</sub> ) <sub>2</sub> ·3H <sub>2</sub> O  | Na <sub>2</sub> SO <sub>4</sub> (0.05 mmol)                | Needle-shaped crystal (Similar to Figure S1a) |
| 5     | Cu(NO <sub>3</sub> ) <sub>2</sub> ·3H <sub>2</sub> O  | Na <sub>2</sub> SO <sub>4</sub> (0.025 mmol)               | Needle-shaped crystal (Similar to Figure S1a) |
| 6     | Cu(NO <sub>3</sub> ) <sub>2</sub> ·3H <sub>2</sub> O  | Na <sub>2</sub> SO <sub>4</sub> (0.0125 mmol)              | Blue precipitate + microcrystals              |
| 7     | Cu(NO <sub>3</sub> ) <sub>2</sub> ·3H <sub>2</sub> O  | NaBF <sub>4</sub> (0.1 mmol)                               | Blue precipitate                              |
| 8     | Cu(NO <sub>3</sub> ) <sub>2</sub> ·3H <sub>2</sub> O  | Na <sub>3</sub> PO <sub>4</sub> (0.1 mmol)                 | Immediate blue precipitate                    |
| 9     | Cu(ClO <sub>4</sub> ) <sub>2</sub> ·6H <sub>2</sub> O | (NH <sub>4</sub> ) <sub>2</sub> SO <sub>4</sub> (0.1 mmol) | Needle-shaped crystal (Similar to Figure S1a) |
| 10    | Cu(ClO <sub>4</sub> ) <sub>2</sub> ·6H <sub>2</sub> O | Na <sub>2</sub> SO <sub>4</sub> (0.1 mmol)                 | Needle-shaped crystal (Similar to Figure S1a) |

## 6. Thermogravimetric Analysis (TGA)

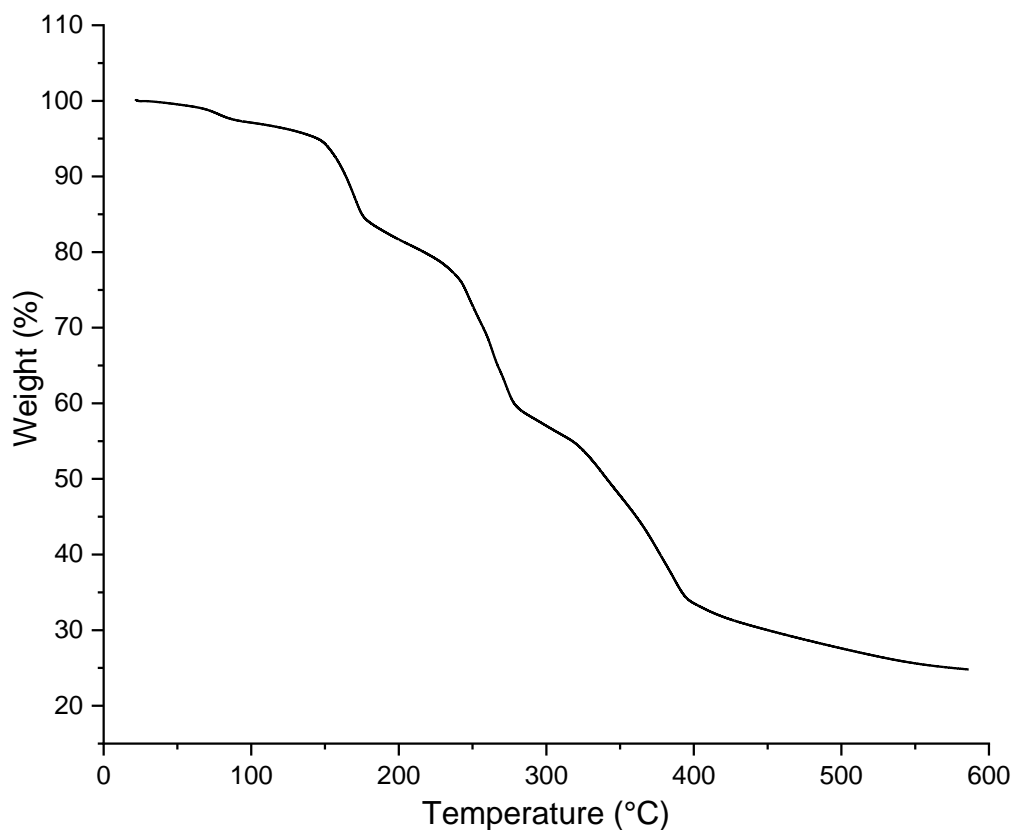

**Figure S8:** TGA of as synthesized **HI-101**.

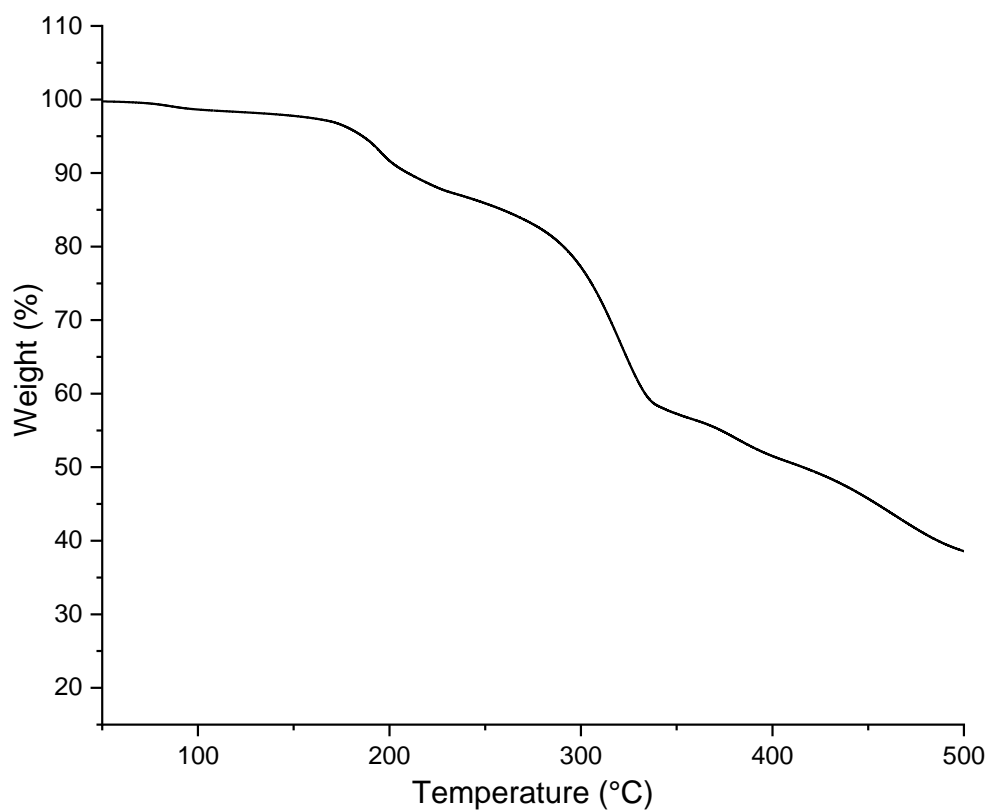

**Figure S9:** TGA of **HI-101** dried at 70.0 °C for 12 h.

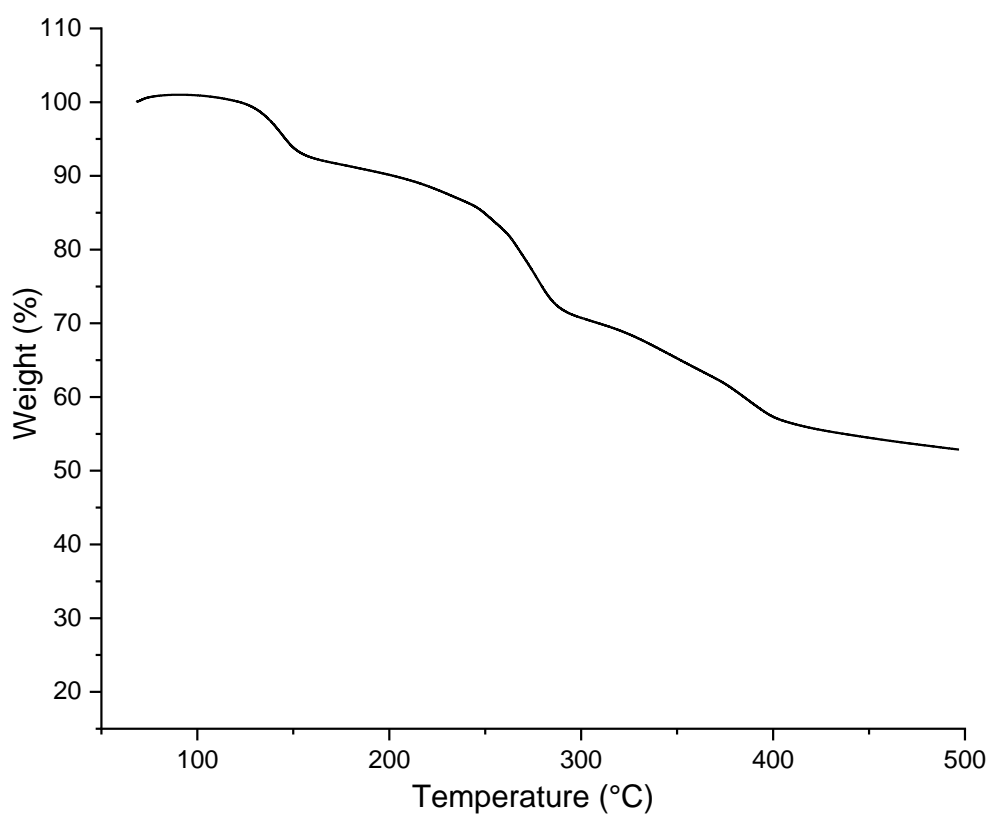

**Figure S10:** TGA of as synthesized **HI-102**.

## 7. Catalytic activity of HI-101

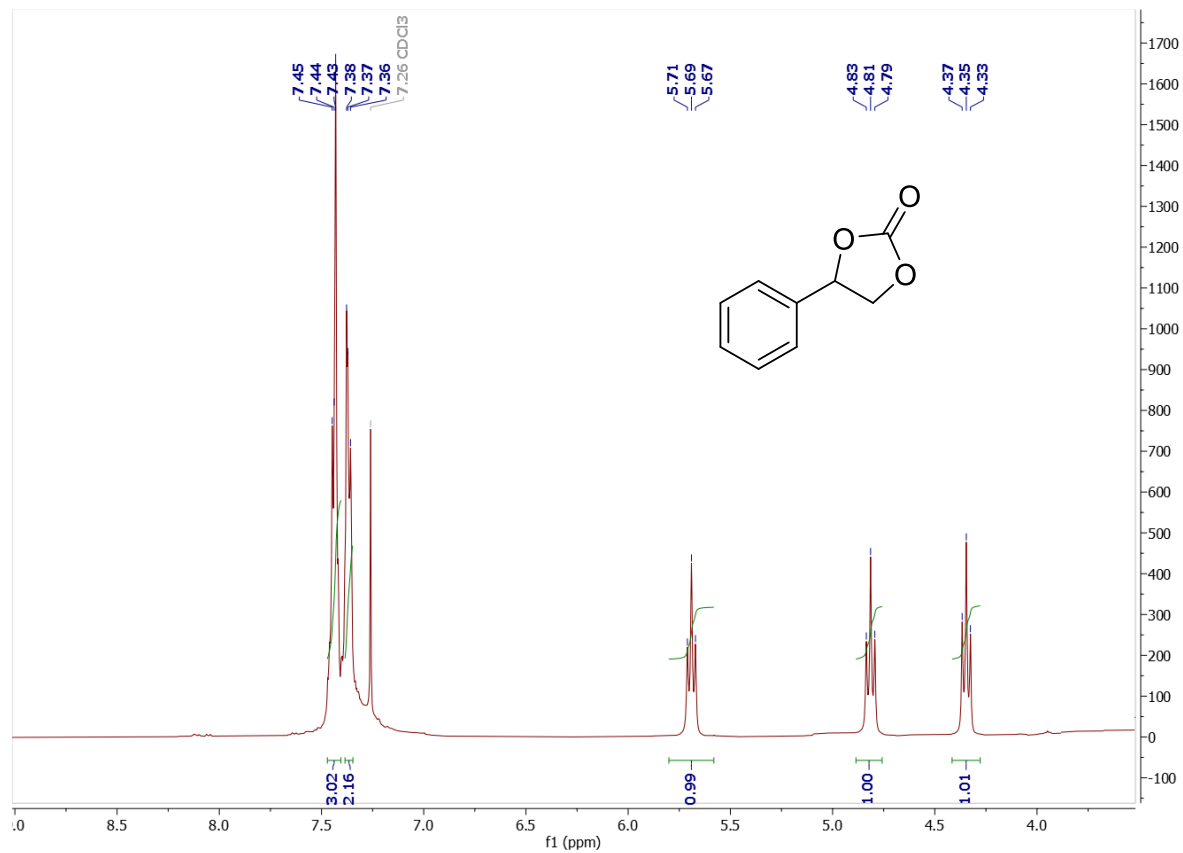

**Figure S11:** <sup>1</sup>H-NMR spectrum of the product obtained from **HI-101** catalyzed CO<sub>2</sub> fixation reaction of styrene oxide.

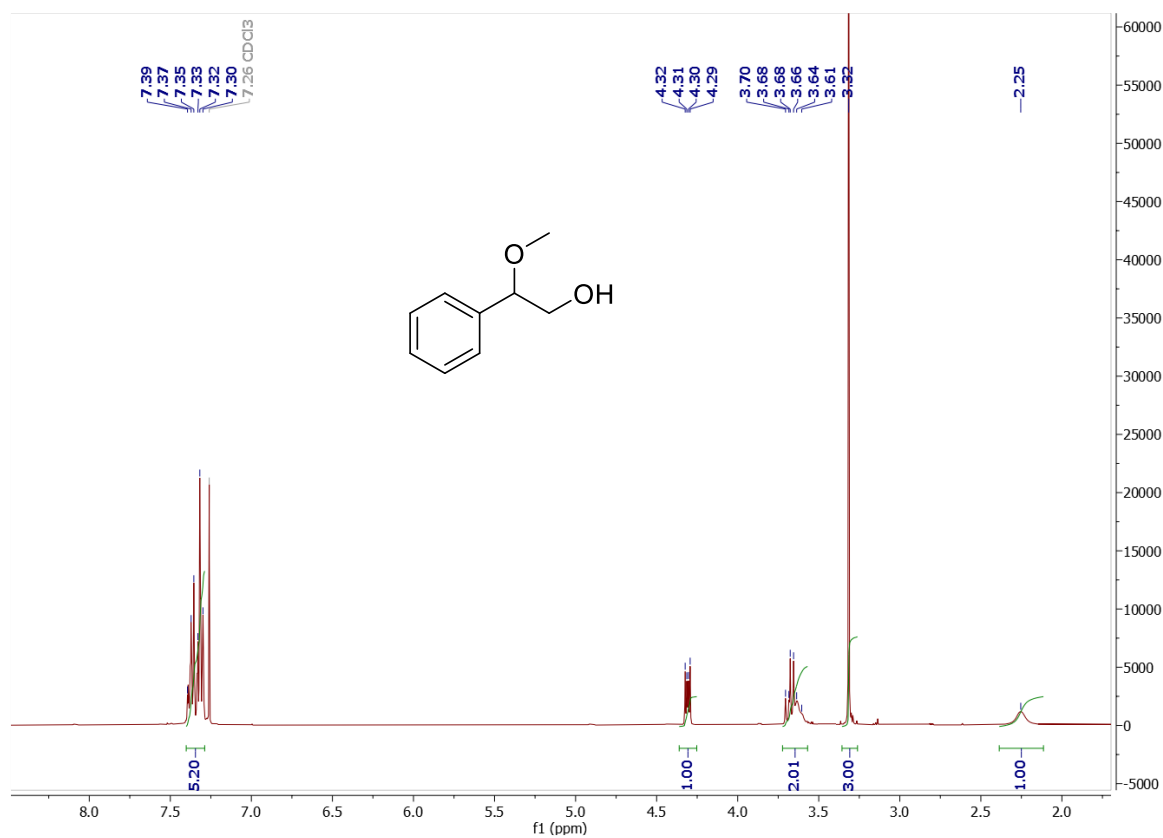

**Figure S12:**  $^1\text{H-NMR}$  spectrum of the product obtained from **HI-101** catalyzed methanolysis reaction of styrene oxide.

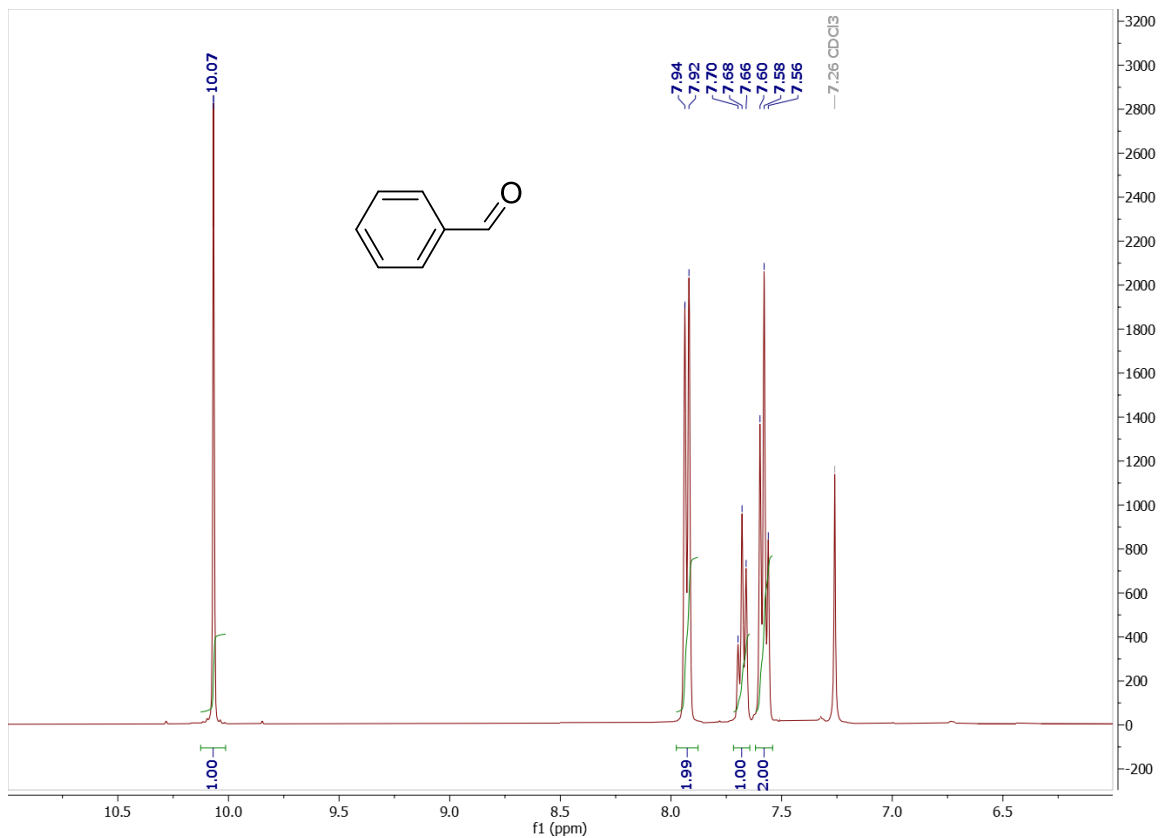

**Figure S13:**  $^1\text{H-NMR}$  spectrum of the product obtained from **HI-101** catalyzed oxidation reaction of benzyl alcohol.
